# Supplementary material for: Association of CSF proteins with tau and amyloid β levels in asymptomatic 70-year-olds
Source: PubMed Central journal article supplement (PMC7923505; doi:10.1186/s13195-021-00789-5), 2021-03-02

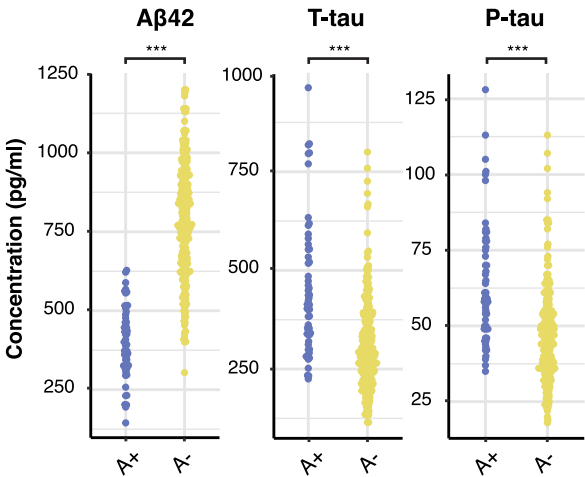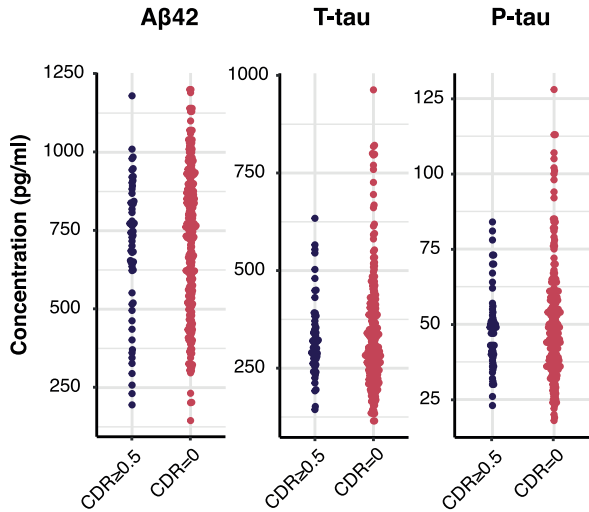

Supplement: 13195_2021_789_MOESM4_ESM.pdf [file 13195_2021_789_MOESM4_ESM.pdf]
